# Supplementary material for: Unraveling the real active sites of an amorphous silica–alumina-supported nickel catalyst for highly efficient ethylene oligomerization
Source: Royal Society of Chemistry journal article supplement (doi:10.1039/d0cy01691h), 2020-11-23
Supplement: d0cy01691h1.pdf [file d0cy01691h1.pdf]

## Supplementary Information

### **Unraveling the original active sites of amorphous silica-alumina supported nickel catalyst for highly efficient ethylene oligomerization**

Jinghua Xu,<sup>a</sup> Ruifeng Wang,<sup>a</sup> Lirong Zheng,<sup>b</sup> Junguo Ma,<sup>a</sup> Wenjun Yan,<sup>c</sup> Xiaofeng Yang,<sup>a</sup> Junying Wang,<sup>c</sup> Xiong Su,<sup>\*a</sup> Yanqiang Huang,<sup>\*a</sup>

<sup>a</sup> CAS Key Laboratory of Science and Technology on Applied Catalysis, Dalian Institute of Chemical Physics, Chinese Academy of Sciences, Dalian 116023, China.

E-mai: [suxiong@dicp.ac.cn](mailto:suxiong@dicp.ac.cn), [yqhuang@dicp.ac.cn](mailto:yqhuang@dicp.ac.cn)

<sup>b</sup> Beijing Synchrotron Radiation Facility (BSRF), Institute of High Energy Physics, Chinese Academy of Sciences, Beijing 100049, China

<sup>c</sup> Analytical Instrumentation Center, Institute of Coal Chemistry, Chinese Academy of Sciences, Taiyuan 030001, China

## Supplementary Figures

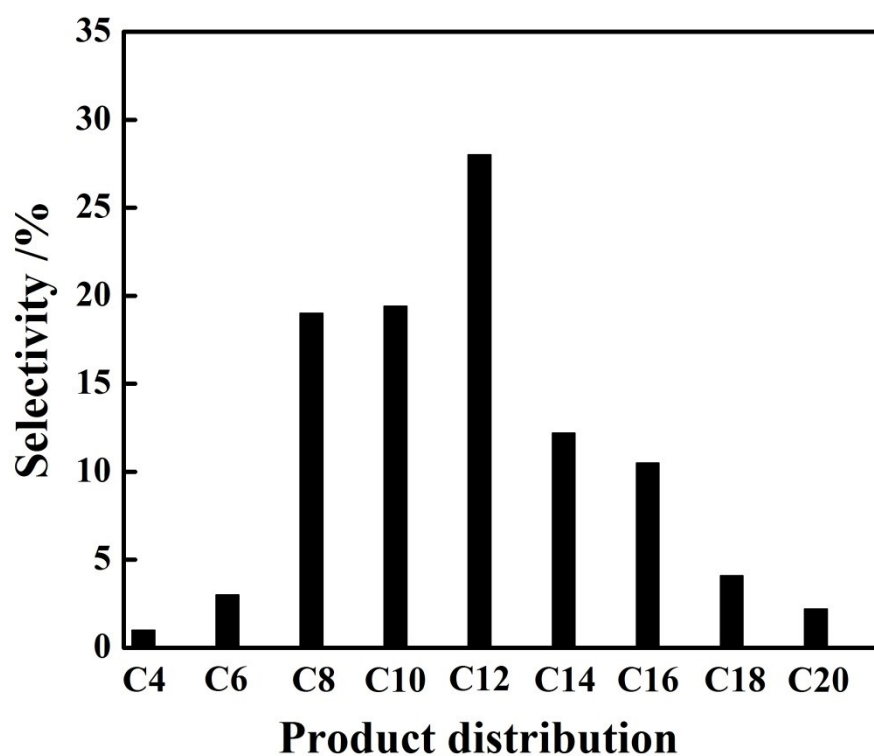

**Fig. S1** The detailed product distribution of ethylene oligomerization on the N<sub>2</sub>-Ni/ASA catalyst. Reaction conditions: 60 °C, 3.0 MPa, 0.5 g catalyst, 50% C<sub>2</sub>H<sub>4</sub> - 50% N<sub>2</sub> with a flowrate of 15 mL min<sup>-1</sup>.

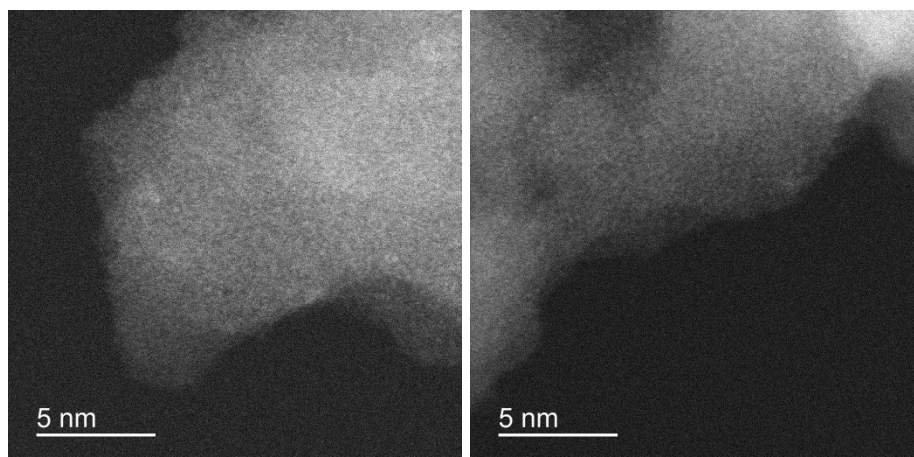

**Fig. S2** HAADF-STEM images of the N<sub>2</sub>-Ni-ASA sample.

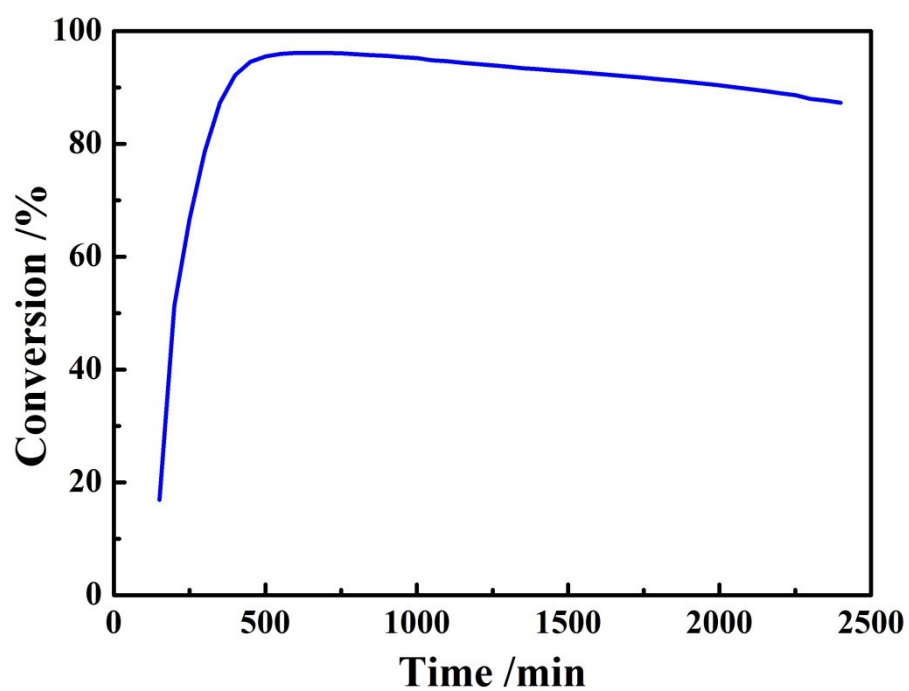

**Fig. S3** The stability testing of the N<sub>2</sub>-pretreated catalyst. Reaction condition: 0.5 g catalyst, reaction temperature is 60 °C, reaction pressure is 3 MPa, 50% C<sub>2</sub>H<sub>4</sub> - 50% N<sub>2</sub> with a flowrate of 15 mL min<sup>-1</sup>.

For the calculation of if the product follows a Schulz-Flory type distribution or not, the following equation of Schulz-Flory equation was used:

$$\log(W_n/n) = n \log \alpha + \log((1-\alpha)^2/\alpha)$$

where,  $n$  is the number of monomer units in the oligomer,  $W_n$  is the mass fraction of the  $n^{\text{th}}$  oligomer, and  $\alpha$  is the chain growth probability (growth factor).

We have further tested the ethylene oligomerization performance on the  $N_2$ -Ni/ASA catalyst at a high MHSV of  $2.25 \text{ h}^{-1}$ . Upon the product distribution (see Fig. S4), we plotted  $\log(W_n/n)$  as a function of  $(n-1)$  by using the above equation, as shown in Fig S5. There is almost a linear relationship. Therefore, the product distribution at a high MHSV of  $2.25 \text{ h}^{-1}$  (by reducing the residence time) follows Schulz-Flory type distribution. A metallacycle mechanism for the oligomerization of ethylene over  $Ni^+$  ions in such  $N_2$ -Ni/ASA catalyst can be proposed.

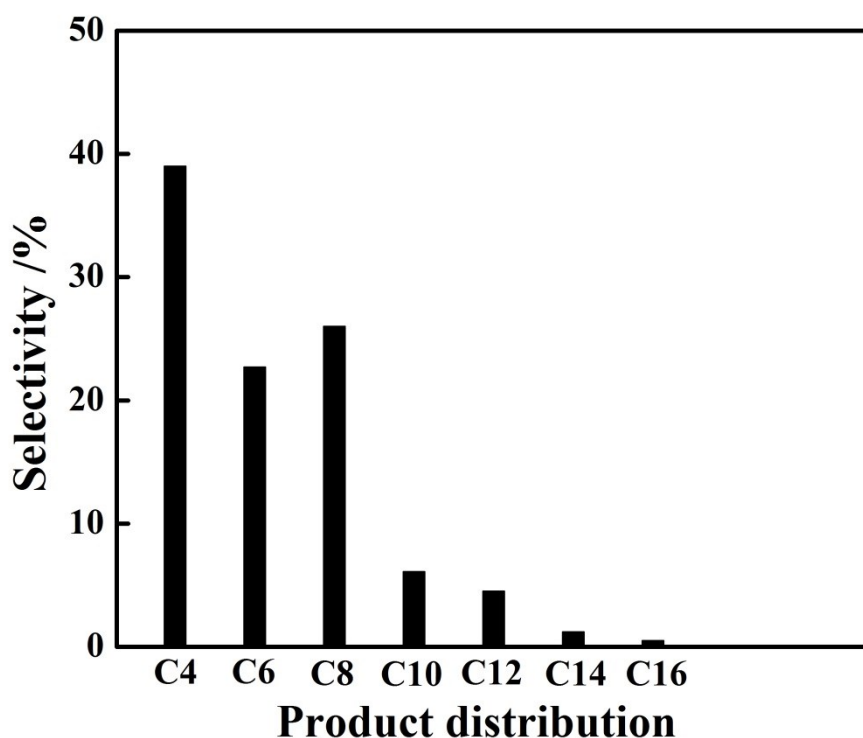

Fig. S4 The detailed product distribution of ethylene oligomerization on the  $N_2$ -Ni/ASA catalyst. Reaction conditions:  $60^\circ\text{C}$ ,  $3.0 \text{ MPa}$ ,  $0.5 \text{ g catalyst}$ ,  $50\% \text{ C}_2\text{H}_4 - 50\% \text{ N}_2$  with a flowrate of  $15 \text{ mL min}^{-1}$ , MSHV =  $2.25 \text{ h}^{-1}$ .

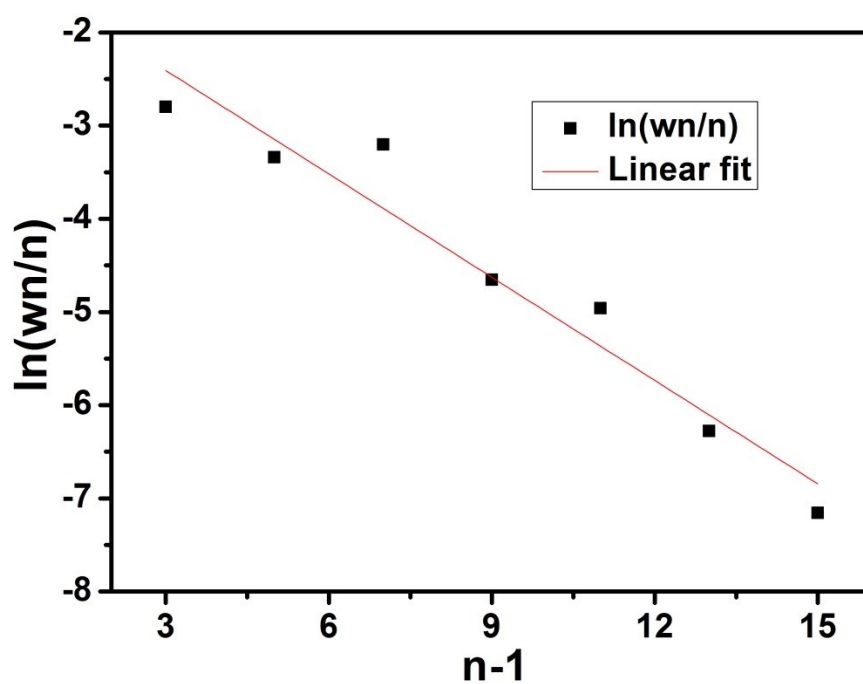

Fig. S5 The calculation of carbon chain growth probability. Reaction conditions: 60 °C, 3.0 MPa, 0.5 g catalyst, 50% C<sub>2</sub>H<sub>4</sub> - 50% N<sub>2</sub> with a flowrate of 15 mL min<sup>-1</sup>, MSHV = 2.25 h<sup>-1</sup>.

## Supplementary Tables

**Table S1.** Linear and branched C<sub>4</sub> - C<sub>12</sub> products of the ethylene oligomerization reaction.

| Sample                     | C <sub>4</sub> /% |      | C <sub>6</sub> /% |      | C <sub>8</sub> /% |      | C <sub>10</sub> /% |      | C <sub>12</sub> /% |      |
|----------------------------|-------------------|------|-------------------|------|-------------------|------|--------------------|------|--------------------|------|
|                            | LO                | BO   | LO                | BO   | LO                | BO   | LO                 | BO   | LO                 | BO   |
| N <sub>2</sub> -pretreated | 69.4              | 30.6 | 14.8              | 85.2 | 12.1              | 87.9 | 0.8                | 99.2 | 0.9                | 99.1 |

Note: LO means linear olefins; BO means branched olefins
